# Supplementary material for: Hematite iron oxide nanoparticles: apoptosis of myoblast cancer cells and their arithmetical assessment
Source: Royal Society of Chemistry journal article supplement (doi:10.1039/c8ra02613k), 2018-01-01
Supplement: c8ra02613k1.pdf [file c8ra02613k1.pdf]

### Supplementary Informations

**Table S1.** Statistical parameters for the determination  $\alpha$ -Fe<sub>2</sub>O<sub>3</sub>NPs.

| S.N | Parameters                                     | $\alpha$ -Fe <sub>2</sub> O <sub>3</sub> -NPs |
|-----|------------------------------------------------|-----------------------------------------------|
| 1.  | Color intensity time                           | 1 day                                         |
| 2.  | Temperature of solutions                       | 25 ± 1°C                                      |
| 3.  | Wavelength(nm)                                 | 360                                           |
| 4.  | Spectra range (nm)                             | 190-900                                       |
| 5.  | Beer' s law limit (µg/ml)                      | 0.05-1.0 µg/ml                                |
| 6.  | Molar absorptivity (L/mol/cm)                  | 9.20 × 10 <sup>3</sup>                        |
| 7.  | Linear regression equation                     | A=-0.109+1.732C                               |
| 8.  | ±ts <sub>a</sub>                               | 0.013                                         |
| 9.  | ±ts <sub>b</sub>                               | 0.024                                         |
| 10. | Correlation coefficient (r)                    | 0.9996                                        |
| 11. | Variance(So <sup>2</sup> ) of calibration line | 2.04×10 <sup>-4</sup>                         |
| 12. | Detection limit (µg/ml)                        | 402.5                                         |
| 13. | Quantitation limit (µg/ml)                     | 1219.7                                        |

Where ±ts<sub>a</sub> and ±ts<sub>b</sub> are confidence limits for intercepts and slope respectively.

**Table S2.** Test of precision and accuracy of the proposed method for  $\alpha$ -Fe<sub>2</sub>O<sub>3</sub>NPs

| <b>Parameters</b>                                        | <b>Intraday</b> |        |        | <b>Interday</b> |       |       |
|----------------------------------------------------------|-----------------|--------|--------|-----------------|-------|-------|
| <b>Concentration taken (<math>\mu\text{g/ml}</math>)</b> | 0.221           | 0.732  | 1.125  | 0.221           | 0.732 | 1.125 |
| <b>Concentration found (<math>\mu\text{g/ml}</math>)</b> | 0.223           | 0.733  | 1.126  | 0.220           | 0.727 | 1.122 |
| <b>Standard deviation (<math>\mu\text{g/ml}</math>)</b>  | 0.002           | 0.014  | 0.016  | 0.003           | 0.013 | 0.017 |
| <b>Recovery (%)</b>                                      | 100.94          | 100.13 | 100.08 | 99.54           | 99.31 | 99.76 |
| <b>Relative Standard deviation</b>                       | 0.918           | 1.951  | 1.463  | 1.483           | 1.814 | 1.525 |

Mean measured from five independent (n=5) determinations for all data points at 95% confidence level.
